# Supplementary material for: A High Throughput Screening Assay System for the Identification of Small Molecule Inhibitors of gsp
Source: PubMed Central journal article supplement (PMC3965391; doi:10.1371/journal.pone.0090766), 2014-03-25
Supplement: pone.0090766.s015.pdf [file pone.0090766.s015.pdf]

| Sample ID       | Cluster | Members | Structure                                                                            | IC50(uM) | PubChem link                                                                                                                                    |
|-----------------|---------|---------|--------------------------------------------------------------------------------------|----------|-------------------------------------------------------------------------------------------------------------------------------------------------|
| MLS001215208-01 | 1       | 27      | 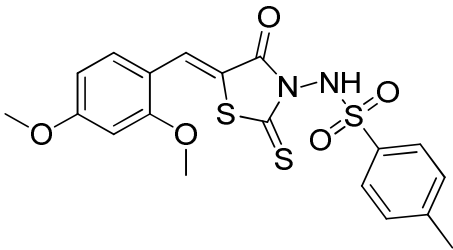   | 7.9433   | <a href="http://pubchem.ncbi.nlm.nih.gov/summary/summary.cgi?sid=49666882">http://pubchem.ncbi.nlm.nih.gov/summary/summary.cgi?sid=49666882</a> |
| MLS001210478-01 | 1       | 27      |    | 3.1623   | <a href="http://pubchem.ncbi.nlm.nih.gov/summary/summary.cgi?sid=49643895">http://pubchem.ncbi.nlm.nih.gov/summary/summary.cgi?sid=49643895</a> |
| MLS000778429-01 | 1       | 27      |    | 5.6234   | <a href="http://pubchem.ncbi.nlm.nih.gov/summary/summary.cgi?sid=26663362">http://pubchem.ncbi.nlm.nih.gov/summary/summary.cgi?sid=26663362</a> |
| MLS000755805-01 | 1       | 27      |     | 7.9433   | <a href="http://pubchem.ncbi.nlm.nih.gov/summary/summary.cgi?sid=24824463">http://pubchem.ncbi.nlm.nih.gov/summary/summary.cgi?sid=24824463</a> |
| MLS000850781-01 | 1       | 27      |  | 10       | <a href="http://pubchem.ncbi.nlm.nih.gov/summary/summary.cgi?sid=26731521">http://pubchem.ncbi.nlm.nih.gov/summary/summary.cgi?sid=26731521</a> |

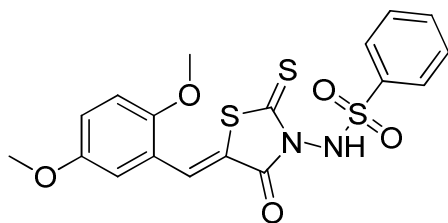

MLS001215276-01

1

27

5.0119

<http://pubchem.ncbi.nlm.nih.gov/summary/summary.cgi?sid=49646959>

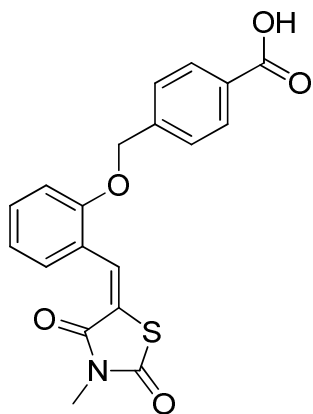

MLS000686304-01

1

27

8.9125

<http://pubchem.ncbi.nlm.nih.gov/summary/summary.cgi?sid=24822909>

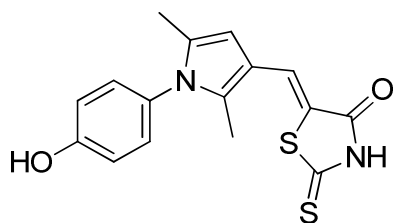

MLS000779147-01

1

27

25.1189

<http://pubchem.ncbi.nlm.nih.gov/summary/summary.cgi?sid=26660292>

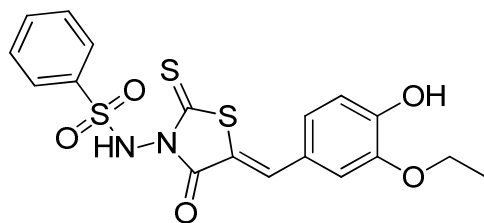

MLS001215303-01

1

27

39.8107

<http://pubchem.ncbi.nlm.nih.gov/summary/summary.cgi?sid=49646131>

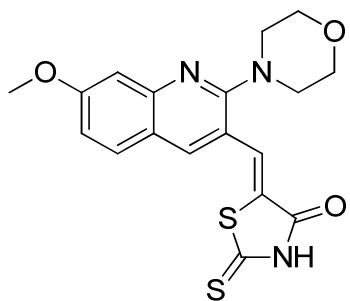

MLS000590439-01

1

27

2.5119

<http://pubchem.ncbi.nlm.nih.gov/summary/summary.cgi?sid=17513514>

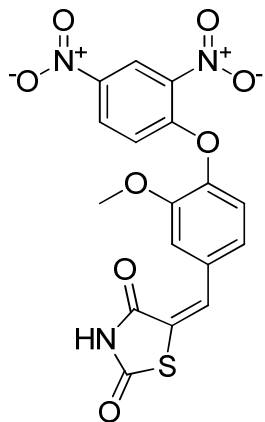

MLS000765074-01

1

27

5.6234

<http://pubchem.ncbi.nlm.nih.gov/summary/summary.cgi?sid=24822652>

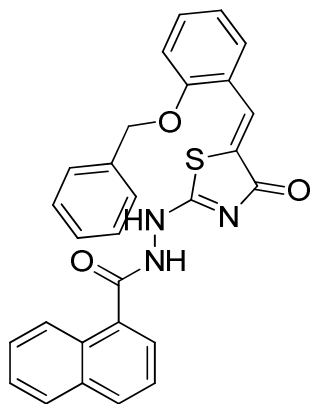

MLS000566525-01

1

27

11.2202

<http://pubchem.ncbi.nlm.nih.gov/summary/summary.cgi?sid=17408099>

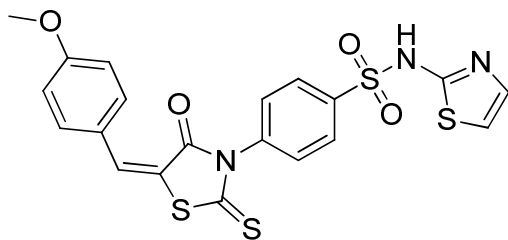

MLS000850782-01

1

27

11.2202 <http://pubchem.ncbi.nlm.nih.gov/summary/summary.cgi?sid=26731479>

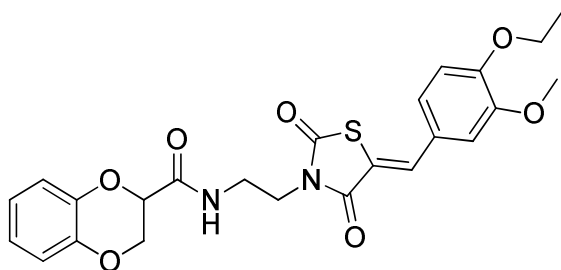

MLS000335351-01

1

27

14.1254 <http://pubchem.ncbi.nlm.nih.gov/summary/summary.cgi?sid=22409231>

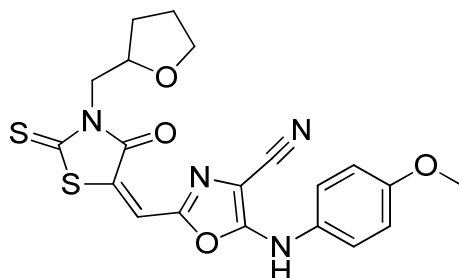

MLS000333439-01

1

27

22.3872 <http://pubchem.ncbi.nlm.nih.gov/summary/summary.cgi?sid=26671258>

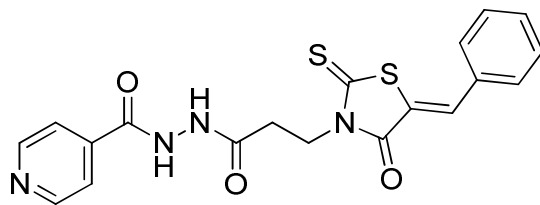

MLS000711080-01

1

27

12.5893 <http://pubchem.ncbi.nlm.nih.gov/summary/summary.cgi?sid=24784043>

|                 |   |    |                                                                                      |         |                                                                                                                                                 |
|-----------------|---|----|--------------------------------------------------------------------------------------|---------|-------------------------------------------------------------------------------------------------------------------------------------------------|
| MLS001214710-01 | 1 | 27 | 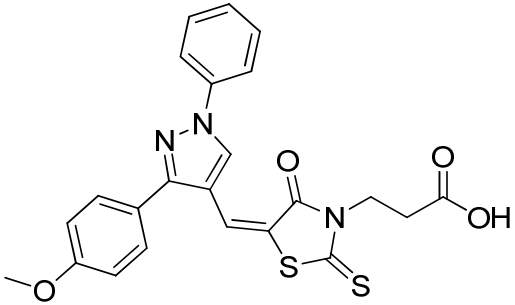   | 3.1623  | <a href="http://pubchem.ncbi.nlm.nih.gov/summary/summary.cgi?sid=49646097">http://pubchem.ncbi.nlm.nih.gov/summary/summary.cgi?sid=49646097</a> |
| MLS000703572-01 | 1 | 27 |    | 4.4668  | <a href="http://pubchem.ncbi.nlm.nih.gov/summary/summary.cgi?sid=24801573">http://pubchem.ncbi.nlm.nih.gov/summary/summary.cgi?sid=24801573</a> |
| MLS000331466-01 | 1 | 27 |    | 31.6228 | <a href="http://pubchem.ncbi.nlm.nih.gov/summary/summary.cgi?sid=24791215">http://pubchem.ncbi.nlm.nih.gov/summary/summary.cgi?sid=24791215</a> |
| MLS000775324-01 | 1 | 27 |  | 35.4813 | <a href="http://pubchem.ncbi.nlm.nih.gov/summary/summary.cgi?sid=24836019">http://pubchem.ncbi.nlm.nih.gov/summary/summary.cgi?sid=24836019</a> |

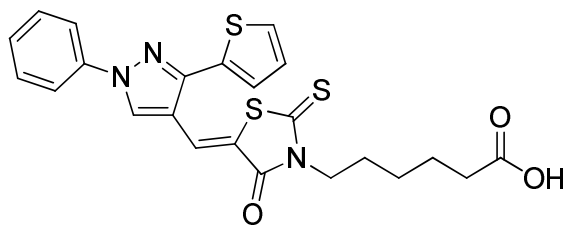

MLS002633376-01 1 27

39.8107 <http://pubchem.ncbi.nlm.nih.gov/summary/summary.cgi?sid=89852067>

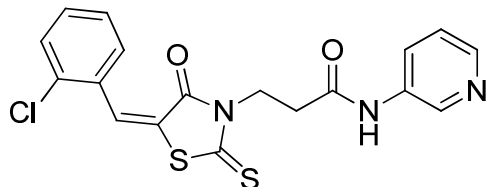

MLS001034529-01 1 27

6.3096 <http://pubchem.ncbi.nlm.nih.gov/summary/summary.cgi?sid=49816355>

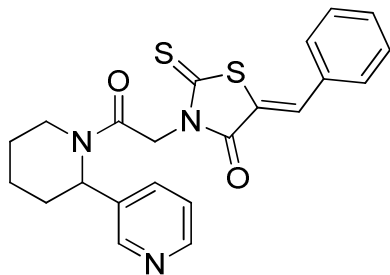

MLS001157953-01 1 27

17.7828 <http://pubchem.ncbi.nlm.nih.gov/summary/summary.cgi?sid=49822477>

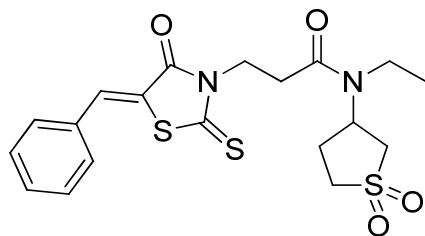

MLS001157871-01 1 27

28.1838 <http://pubchem.ncbi.nlm.nih.gov/summary/summary.cgi?sid=49822511>

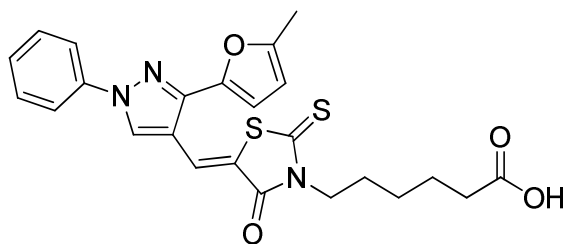

MLS001171467-01

1

27

31.6228

<http://pubchem.ncbi.nlm.nih.gov/summary/summary.cgi?sid=49673957>

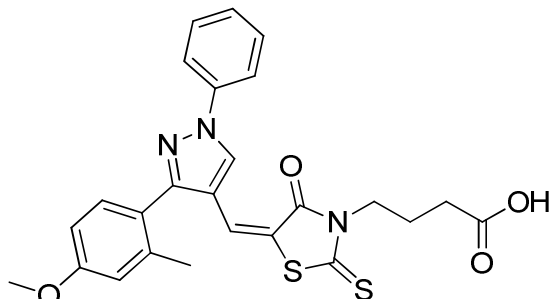

MLS001163553-01

1

27

11.2202

<http://pubchem.ncbi.nlm.nih.gov/summary/summary.cgi?sid=47196686>

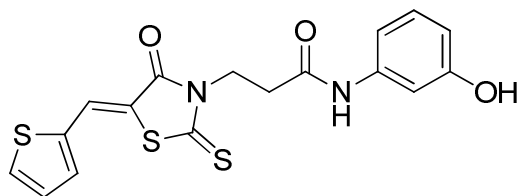

MLS001215512-01

1

27

22.3872

<http://pubchem.ncbi.nlm.nih.gov/summary/summary.cgi?sid=49726708>

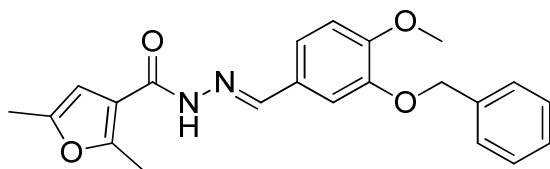

MLS000912277-01

2

14

10

<http://pubchem.ncbi.nlm.nih.gov/summary/summary.cgi?sid=49714058>

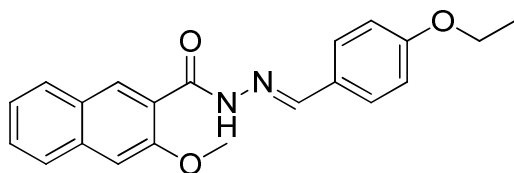

MLS001146490-01

2

14

28.1838

<http://pubchem.ncbi.nlm.nih.gov/summary/summary.cgi?sid=49821204>

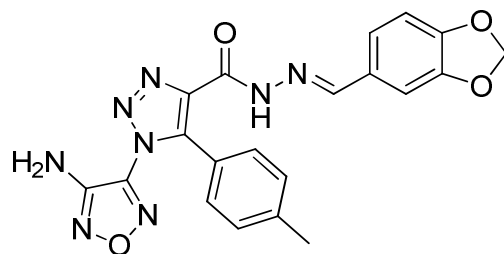

MLS001139341-01

2

14

8.9125

<http://pubchem.ncbi.nlm.nih.gov/summary/summary.cgi?sid=49819872>

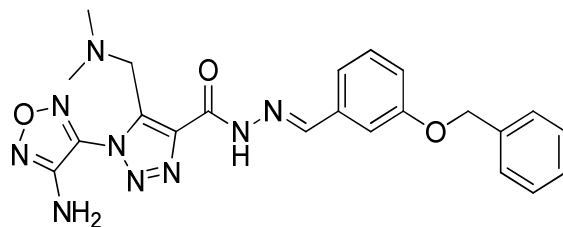

MLS001139448-01

2

14

3.5481

<http://pubchem.ncbi.nlm.nih.gov/summary/summary.cgi?sid=49820327>

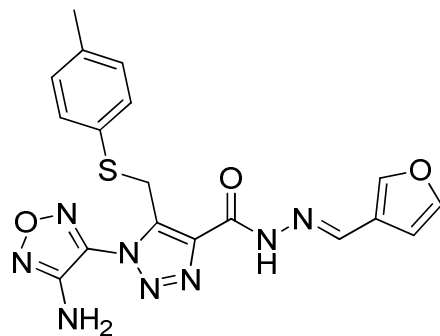

MLS001142840-01

2

14

8.9125

<http://pubchem.ncbi.nlm.nih.gov/summary/summary.cgi?sid=49820227>

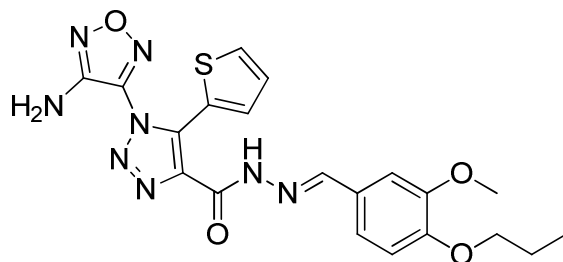

MLS001142666-01

2

14

10

<http://pubchem.ncbi.nlm.nih.gov/summary/summary.cgi?sid=49829167>



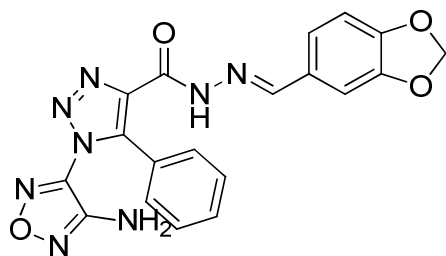

MLS000950063-01

2

14

15.8489

<http://pubchem.ncbi.nlm.nih.gov/summary/summary.cgi?sid=49715853>

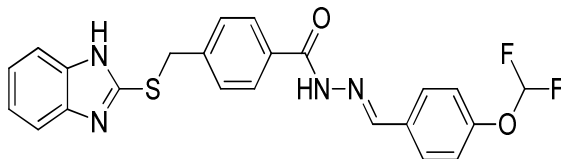

MLS000391853-01

2

14

15.8489

<http://pubchem.ncbi.nlm.nih.gov/summary/summary.cgi?sid=22409883>

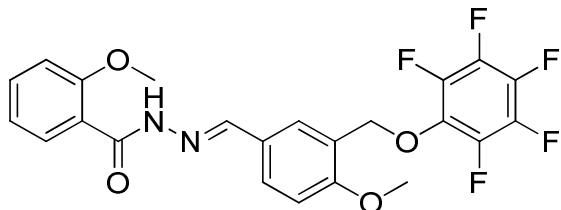

MLS001223916-01

2

14

17.7828

<http://pubchem.ncbi.nlm.nih.gov/summary/summary.cgi?sid=49823934>

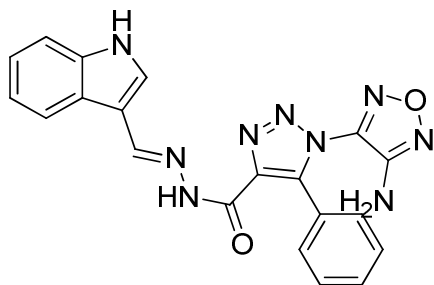

MLS001125728-01

2

14

17.7828

<http://pubchem.ncbi.nlm.nih.gov/summary/summary.cgi?sid=49825727>

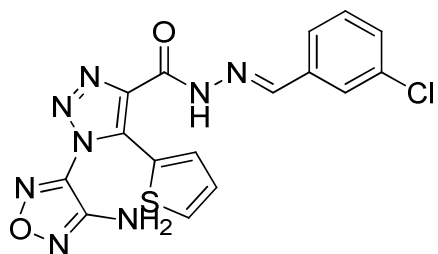

MLS001142665-01 2 14

22.3872 <http://pubchem.ncbi.nlm.nih.gov/summary/summary.cgi?sid=49828660>

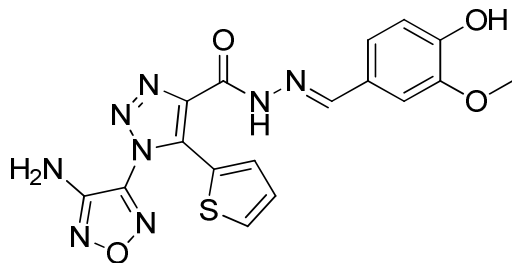

MLS001142684-01 2 14

31.6228 <http://pubchem.ncbi.nlm.nih.gov/summary/summary.cgi?sid=49829392>

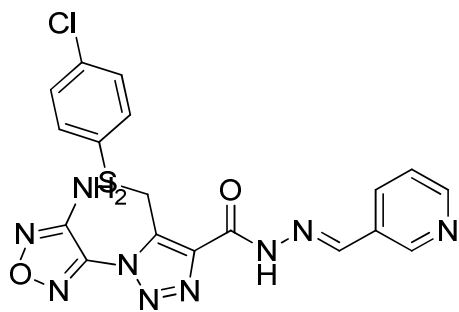

MLS001142866-01 2 14

35.4813 <http://pubchem.ncbi.nlm.nih.gov/summary/summary.cgi?sid=49820234>

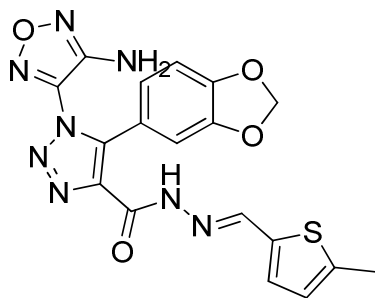

MLS001142659-01 2 14

35.4813 <http://pubchem.ncbi.nlm.nih.gov/summary/summary.cgi?sid=49819819>

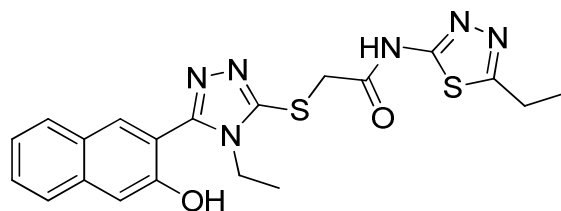

MLS000032897-01

3

14

7.9433

<http://pubchem.ncbi.nlm.nih.gov/summary/summary.cgi?sid=843972>

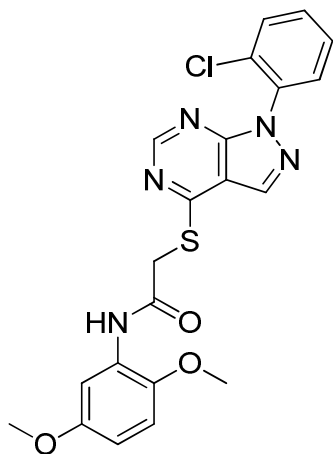

MLS000121713-01

3

14

0.8913

<http://pubchem.ncbi.nlm.nih.gov/summary/summary.cgi?sid=14721552>

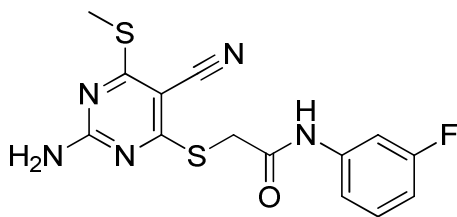

MLS000581831-01

3

14

3.9811

<http://pubchem.ncbi.nlm.nih.gov/summary/summary.cgi?sid=17504754>

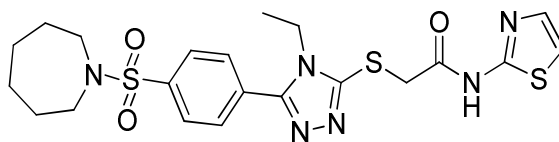

MLS000026902-01

3

14

8.9125

<http://pubchem.ncbi.nlm.nih.gov/summary/summary.cgi?sid=16953352>

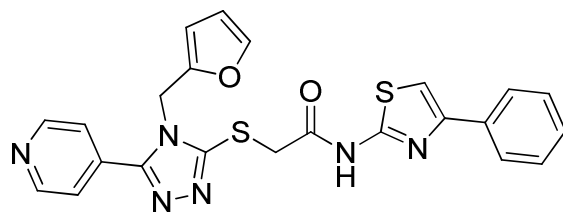

MLS000120988-01

3

14

3.5481

<http://pubchem.ncbi.nlm.nih.gov/summary/summary.cgi?sid=16953298>

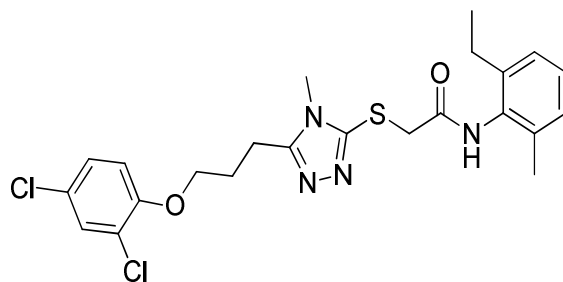

MLS000581485-01

3

14

7.0795

<http://pubchem.ncbi.nlm.nih.gov/summary/summary.cgi?sid=17433424>

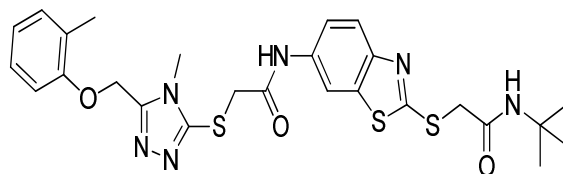

MLS000538142-01

3

14

14.1254

<http://pubchem.ncbi.nlm.nih.gov/summary/summary.cgi?sid=17386392>

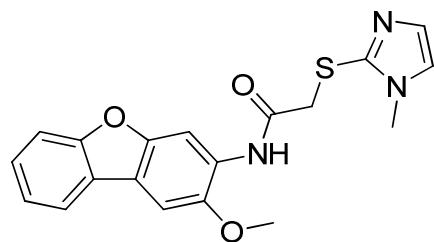

MLS000391488-01

3

14

15.8489

<http://pubchem.ncbi.nlm.nih.gov/summary/summary.cgi?sid=22408416>

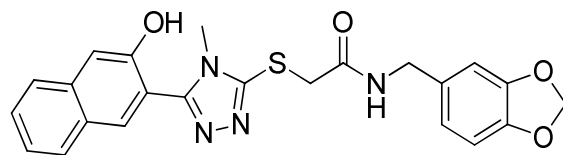

MLS000073611-01

3

14

19.9526

<http://pubchem.ncbi.nlm.nih.gov/summary/summary.cgi?sid=850865>

|                 |   |    |                                                                                      |         |                                                                                                                                                 |
|-----------------|---|----|--------------------------------------------------------------------------------------|---------|-------------------------------------------------------------------------------------------------------------------------------------------------|
| MLS001223062-01 | 3 | 14 | 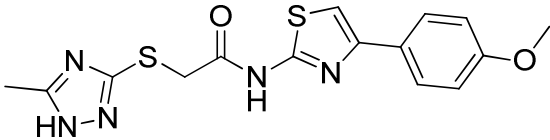   | 22.3872 | <a href="http://pubchem.ncbi.nlm.nih.gov/summary/summary.cgi?sid=49728088">http://pubchem.ncbi.nlm.nih.gov/summary/summary.cgi?sid=49728088</a> |
| MLS000878596-01 | 3 | 14 |    | 28.1838 | <a href="http://pubchem.ncbi.nlm.nih.gov/summary/summary.cgi?sid=24838415">http://pubchem.ncbi.nlm.nih.gov/summary/summary.cgi?sid=24838415</a> |
| MLS000098934-01 | 3 | 14 |     | 31.6228 | <a href="http://pubchem.ncbi.nlm.nih.gov/summary/summary.cgi?sid=3716263">http://pubchem.ncbi.nlm.nih.gov/summary/summary.cgi?sid=3716263</a>   |
| MLS000077078-01 | 3 | 14 |   | 39.8107 | <a href="http://pubchem.ncbi.nlm.nih.gov/summary/summary.cgi?sid=852486">http://pubchem.ncbi.nlm.nih.gov/summary/summary.cgi?sid=852486</a>     |
| MLS001222970-01 | 3 | 14 |  | 50.1187 | <a href="http://pubchem.ncbi.nlm.nih.gov/summary/summary.cgi?sid=49727758">http://pubchem.ncbi.nlm.nih.gov/summary/summary.cgi?sid=49727758</a> |

|                 |   |    |                                                                                      |         |                                                                                                                                                 |
|-----------------|---|----|--------------------------------------------------------------------------------------|---------|-------------------------------------------------------------------------------------------------------------------------------------------------|
| MLS000049694-01 | 4 | 13 | 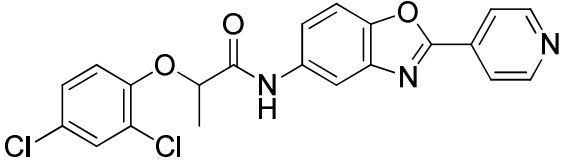   | 15.8489 | <a href="http://pubchem.ncbi.nlm.nih.gov/summary/summary.cgi?sid=4260853">http://pubchem.ncbi.nlm.nih.gov/summary/summary.cgi?sid=4260853</a>   |
| MLS002248306-01 | 4 | 13 |     | 2.5119  | <a href="http://pubchem.ncbi.nlm.nih.gov/summary/summary.cgi?sid=85268849">http://pubchem.ncbi.nlm.nih.gov/summary/summary.cgi?sid=85268849</a> |
| MLS002163313-01 | 4 | 13 |   | 3.5481  | <a href="http://pubchem.ncbi.nlm.nih.gov/summary/summary.cgi?sid=57259665">http://pubchem.ncbi.nlm.nih.gov/summary/summary.cgi?sid=57259665</a> |
| MLS002158990-01 | 4 | 13 |  | 3.9811  | <a href="http://pubchem.ncbi.nlm.nih.gov/summary/summary.cgi?sid=57263130">http://pubchem.ncbi.nlm.nih.gov/summary/summary.cgi?sid=57263130</a> |

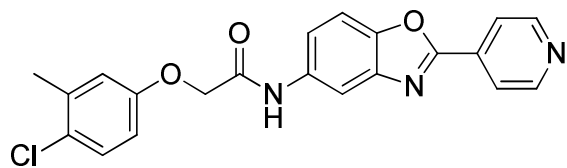

MLS000040007-01

4

13

35.4813

<http://pubchem.ncbi.nlm.nih.gov/summary/summary.cgi?sid=861282>

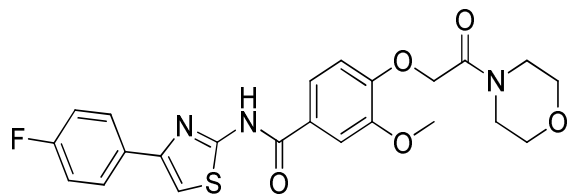

MLS000334344-01

4

13

12.5893

<http://pubchem.ncbi.nlm.nih.gov/summary/summary.cgi?sid=22408888>

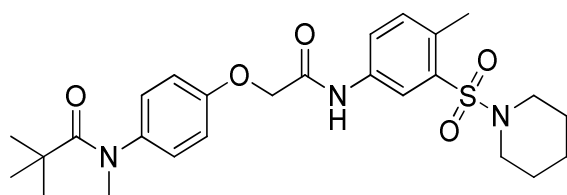

MLS002252318-01

4

13

17.7828

<http://pubchem.ncbi.nlm.nih.gov/summary/summary.cgi?sid=85198345>

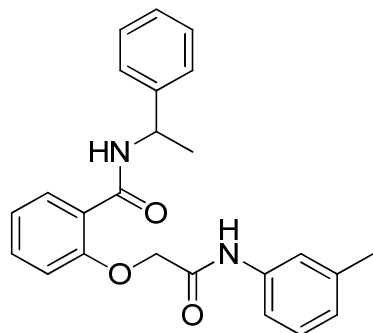

MLS001162588-01

4

13

22.3872

<http://pubchem.ncbi.nlm.nih.gov/summary/summary.cgi?sid=49826088>

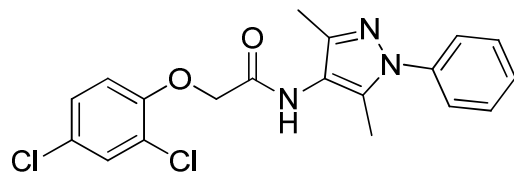

MLS000394578-01

4

13

22.3872

<http://pubchem.ncbi.nlm.nih.gov/summary/summary.cgi?sid=22407316>

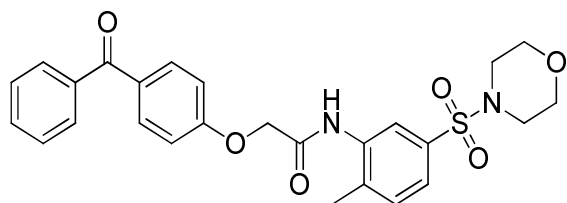

MLS002157773-01

4

13

28.1838

<http://pubchem.ncbi.nlm.nih.gov/summary/summary.cgi?sid=57266521>

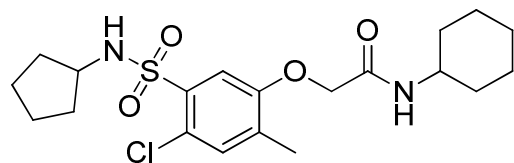

MLS000530891-01

4

13

35.4813

<http://pubchem.ncbi.nlm.nih.gov/summary/summary.cgi?sid=14738855>

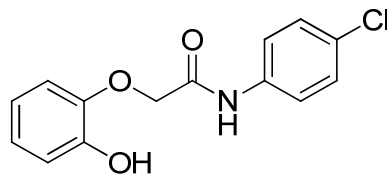

MLS000084641-01

4

13

39.8107

<http://pubchem.ncbi.nlm.nih.gov/summary/summary.cgi?sid=4247491>

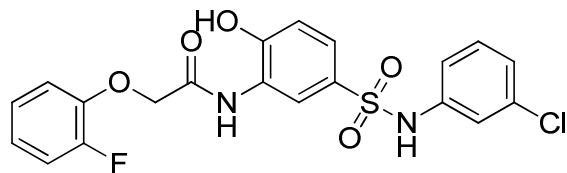

MLS002157282-01

4

13

5.6234

<http://pubchem.ncbi.nlm.nih.gov/summary/summary.cgi?sid=57263037>

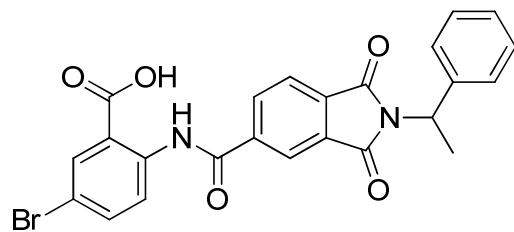

MLS001125049-01

5

12

10

<http://pubchem.ncbi.nlm.nih.gov/summary/summary.cgi?sid=49819363>



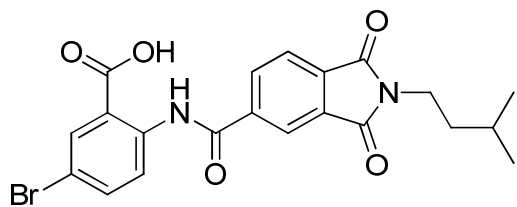

MLS001181350-01

5

12

10

<http://pubchem.ncbi.nlm.nih.gov/summary/summary.cgi?sid=47200585>

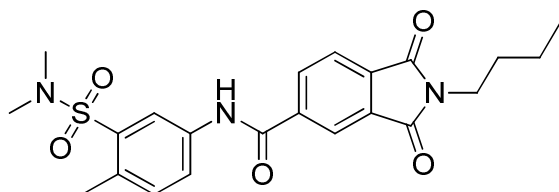

MLS000394125-01

5

12

4.4668

<http://pubchem.ncbi.nlm.nih.gov/summary/summary.cgi?sid=22410665>

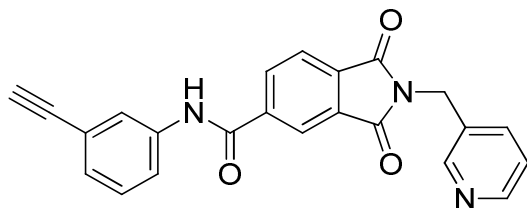

MLS001125011-01

5

12

4.4668

<http://pubchem.ncbi.nlm.nih.gov/summary/summary.cgi?sid=49723899>

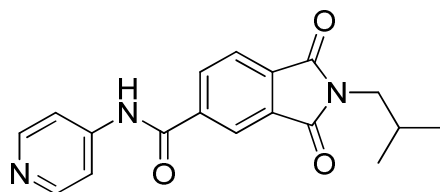

MLS000064902-01

5

12

6.3096

<http://pubchem.ncbi.nlm.nih.gov/summary/summary.cgi?sid=4258848>

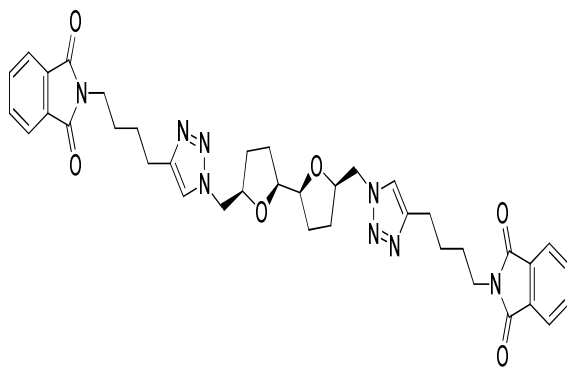

MLS000862940-01

5

12

4.4668

<http://pubchem.ncbi.nlm.nih.gov/summary/summary.cgi?sid=74373619>

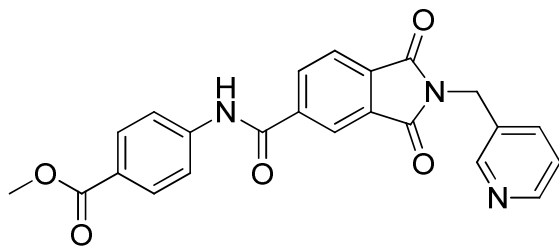

MLS001123926-01

5

12

8.9125

<http://pubchem.ncbi.nlm.nih.gov/summary/summary.cgi?sid=49723583>

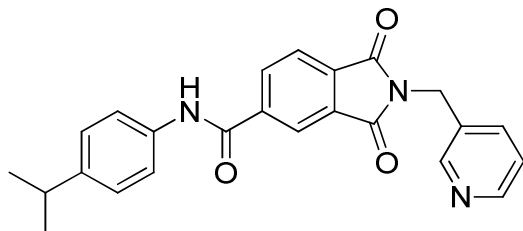

MLS001034698-01

5

12

14.1254

<http://pubchem.ncbi.nlm.nih.gov/summary/summary.cgi?sid=49732591>

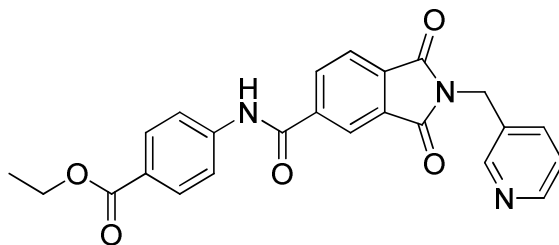

MLS001125015-01

5

12

15.8489

<http://pubchem.ncbi.nlm.nih.gov/summary/summary.cgi?sid=49723994>

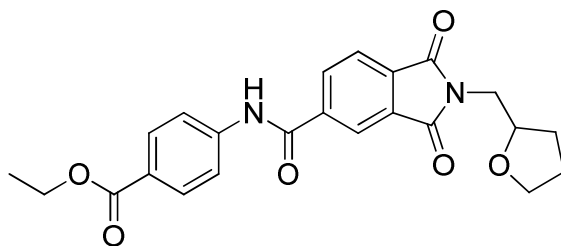

MLS001035359-01

5

12

15.8489

<http://pubchem.ncbi.nlm.nih.gov/summary/summary.cgi?sid=49816638>

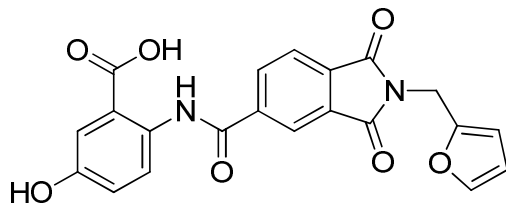

MLS000049852-01

5

12

17.7828

<http://pubchem.ncbi.nlm.nih.gov/summary/summary.cgi?sid=4263603>

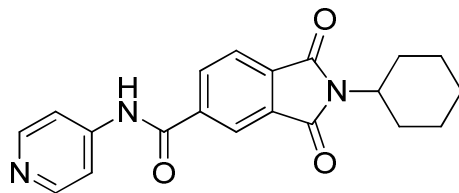

MLS000535216-01

5

12

2.5119

<http://pubchem.ncbi.nlm.nih.gov/summary/summary.cgi?sid=14731475>

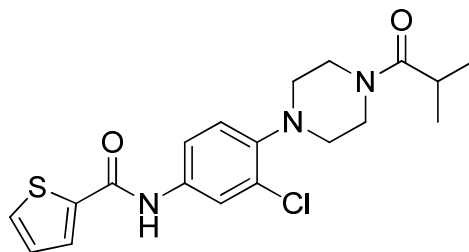

MLS000764737-01

6

11

35.4813

<http://pubchem.ncbi.nlm.nih.gov/summary/summary.cgi?sid=24807232>

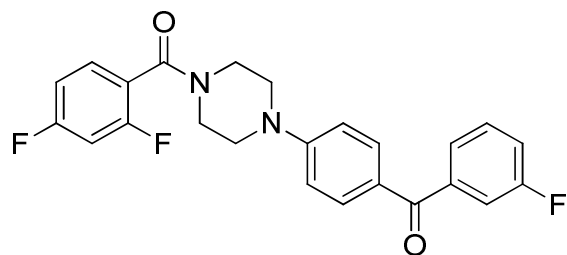

MLS001124808-01

6

11

35.4813 <http://pubchem.ncbi.nlm.nih.gov/summary/summary.cgi?sid=49723714>

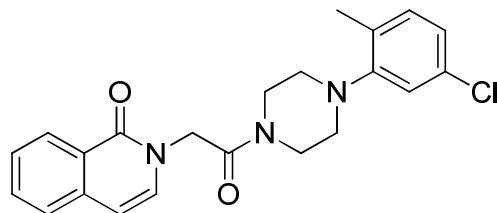

MLS000086165-01

6

11

12.5893 <http://pubchem.ncbi.nlm.nih.gov/summary/summary.cgi?sid=4240935>

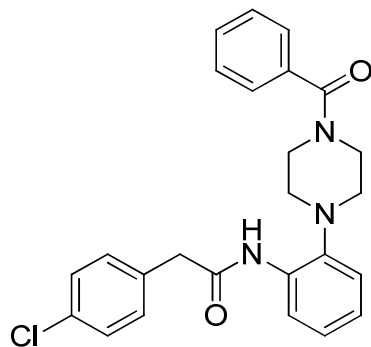

MLS001034278-01

6

11

14.1254 <http://pubchem.ncbi.nlm.nih.gov/summary/summary.cgi?sid=49816131>

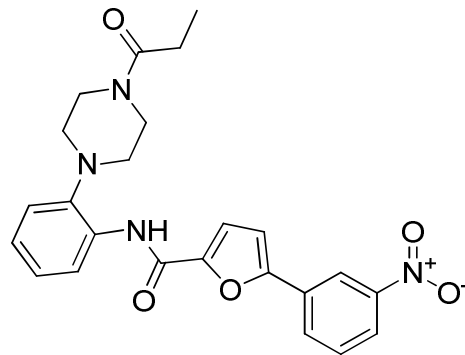

MLS000579470-01

6

11

17.7828 <http://pubchem.ncbi.nlm.nih.gov/summary/summary.cgi?sid=17506869>

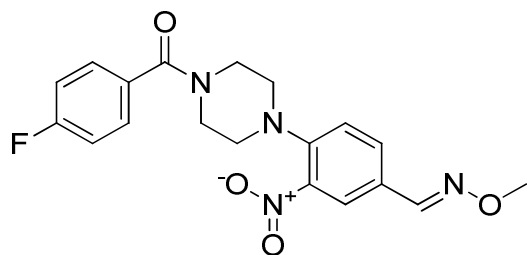

MLS000546853-01

6

11

22.3872 <http://pubchem.ncbi.nlm.nih.gov/summary/summary.cgi?sid=17409393>

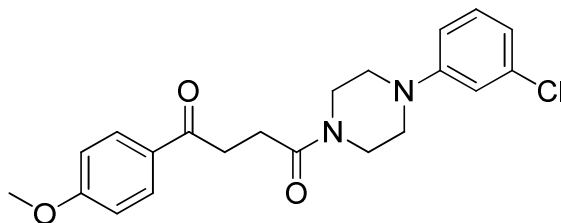

MLS001030525-01

6

11

28.1838 <http://pubchem.ncbi.nlm.nih.gov/summary/summary.cgi?sid=49734544>

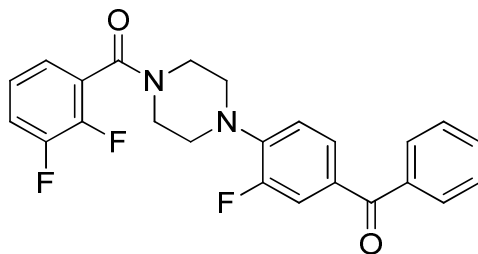

MLS001125755-01

6

11

31.6228 <http://pubchem.ncbi.nlm.nih.gov/summary/summary.cgi?sid=49724287>

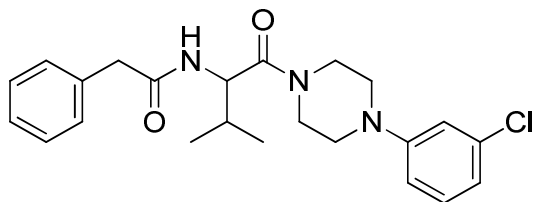

MLS002171379-01

6

11

35.4813 <http://pubchem.ncbi.nlm.nih.gov/summary/summary.cgi?sid=57263654>

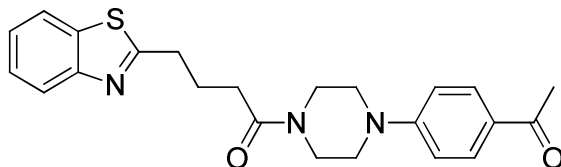

MLS000334486-01

6

11

35.4813 <http://pubchem.ncbi.nlm.nih.gov/summary/summary.cgi?sid=22410332>

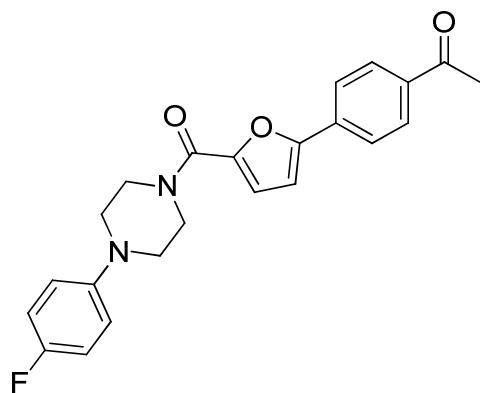

MLS000771283-01

6

11

5.6234

<http://pubchem.ncbi.nlm.nih.gov/summary/summary.cgi?sid=24831196>

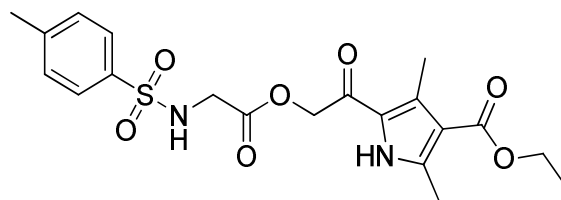

MLS002165922-01

7

11

31.6228

<http://pubchem.ncbi.nlm.nih.gov/summary/summary.cgi?sid=57264253>

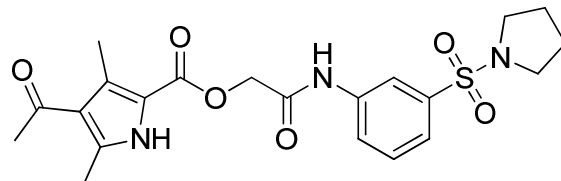

MLS000394103-01

7

11

3.5481

<http://pubchem.ncbi.nlm.nih.gov/summary/summary.cgi?sid=22410645>

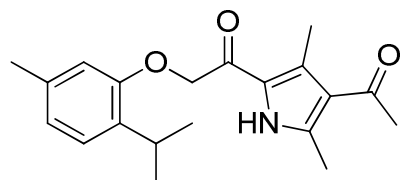

MLS000566302-01

7

11

4.4668

<http://pubchem.ncbi.nlm.nih.gov/summary/summary.cgi?sid=14746031>

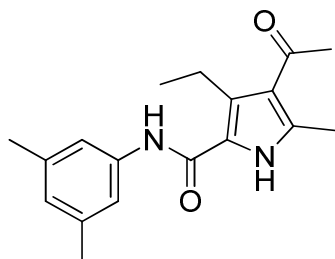

MLS000520313-01

7

11

2.2387

<http://pubchem.ncbi.nlm.nih.gov/summary/summary.cgi?sid=14737284>

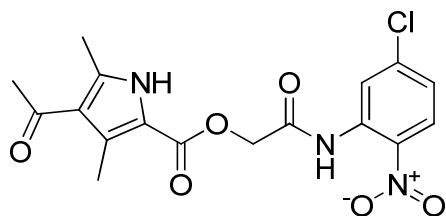

MLS000391301-01

7

11

7.9433

<http://pubchem.ncbi.nlm.nih.gov/summary/summary.cgi?sid=17517128>

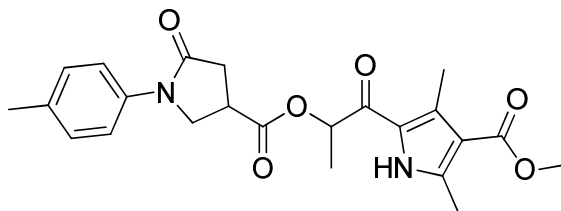

MLS002170129-01

7

11

12.5893

<http://pubchem.ncbi.nlm.nih.gov/summary/summary.cgi?sid=57261262>

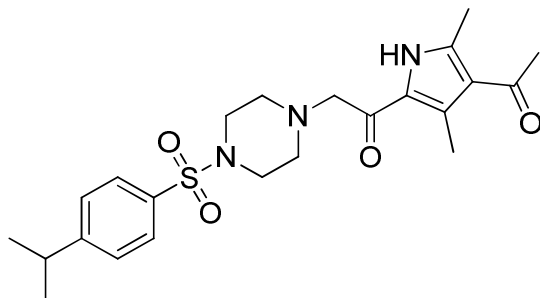

MLS002164383-01

7

11

17.7828

<http://pubchem.ncbi.nlm.nih.gov/summary/summary.cgi?sid=57255995>

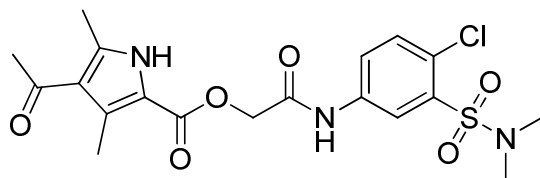

MLS000773345-01

7

11

22.3872 <http://pubchem.ncbi.nlm.nih.gov/summary/summary.cgi?sid=26670214>

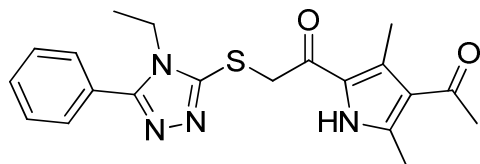

MLS000566135-01

7

11

31.6228 <http://pubchem.ncbi.nlm.nih.gov/summary/summary.cgi?sid=14744792>

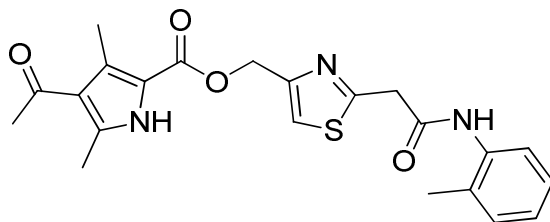

MLS002164397-01

7

11

39.8107 <http://pubchem.ncbi.nlm.nih.gov/summary/summary.cgi?sid=85270680>

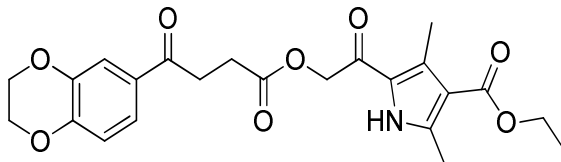

MLS000097716-01

7

11

5.6234 <http://pubchem.ncbi.nlm.nih.gov/summary/summary.cgi?sid=3715768>
